# Supplementary material
Source: PubMed Central journal article supplement (PMC2585171)

## Suppl. Figure 8

**a**

|              |   |   |   |   |   |   |   |   |   |   |   |   |   |   |   |   |          |   |   |   |   |   |   |   |   |   |   |   |   |
|--------------|---|---|---|---|---|---|---|---|---|---|---|---|---|---|---|---|----------|---|---|---|---|---|---|---|---|---|---|---|---|
| <i>GluR1</i> | A | L | R | N | P | V | N | L | A | V | L | K | L | N | E | Q | <b>G</b> | L | L | D | K | L | K | N | K | W | W | Y | D |
| <i>GluR2</i> | S | L | G | N | A | V | N | L | A | V | L | K | L | N | E | Q | <b>G</b> | L | L | D | K | L | K | N | K | W | W | Y | D |
| <i>GluR2</i> | S | L | G | N | A | V | N | L | A | V | L | K | L | N | E | Q | <b>G</b> | L | L | D | K | L | K | N | K | W | W | Y | D |
| <i>GluR2</i> | A | L | G | N | A | V | N | L | A | V | L | K | L | N | E | Q | <b>G</b> | L | L | D | K | L | K | N | K | W | W | Y | D |
| <i>LAOBP</i> | E | L | T | A | A | F | N | K | A | L | G | E | L | R | Q | D | <b>G</b> | T | Y | D | K | M | A | K | K | Y | F | D | F |
| <i>HisBP</i> | E | L | R | E | A | L | N | K | A | F | A | E | M | R | A | D | <b>G</b> | T | Y | E | K | L | A | K | K | Y | F | D | F |
| <i>GlnBP</i> | E | L | R | D | K | V | N | G | A | L | K | T | L | R | E | N | <b>G</b> | T | Y | N | E | I | Y | K | K | W | F | G | T |

**b**

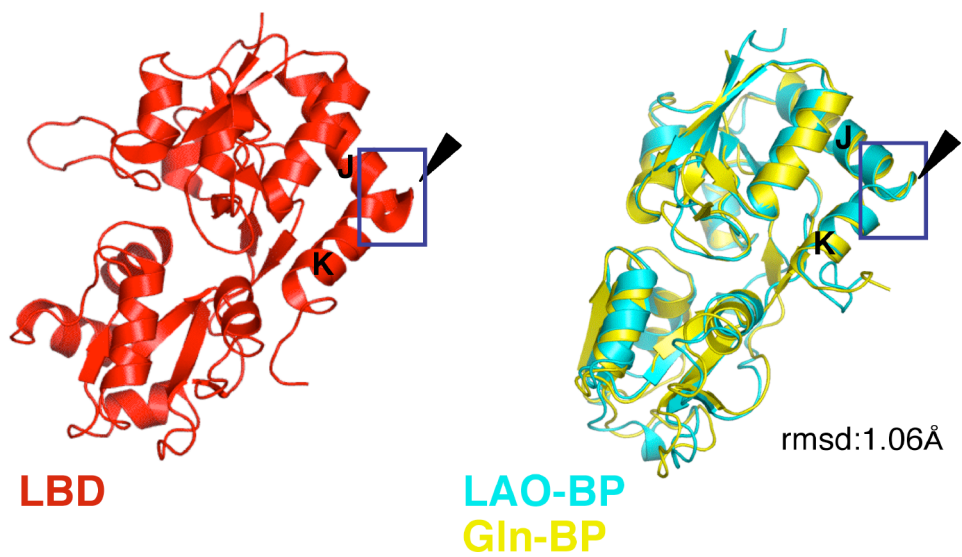

Supplement: emboj2008222s8.pdf [file emboj2008222s8.pdf]
