# Supplementary material
Source: PubMed Central journal article supplement (PMC2585171)

## Suppl. Figure 1

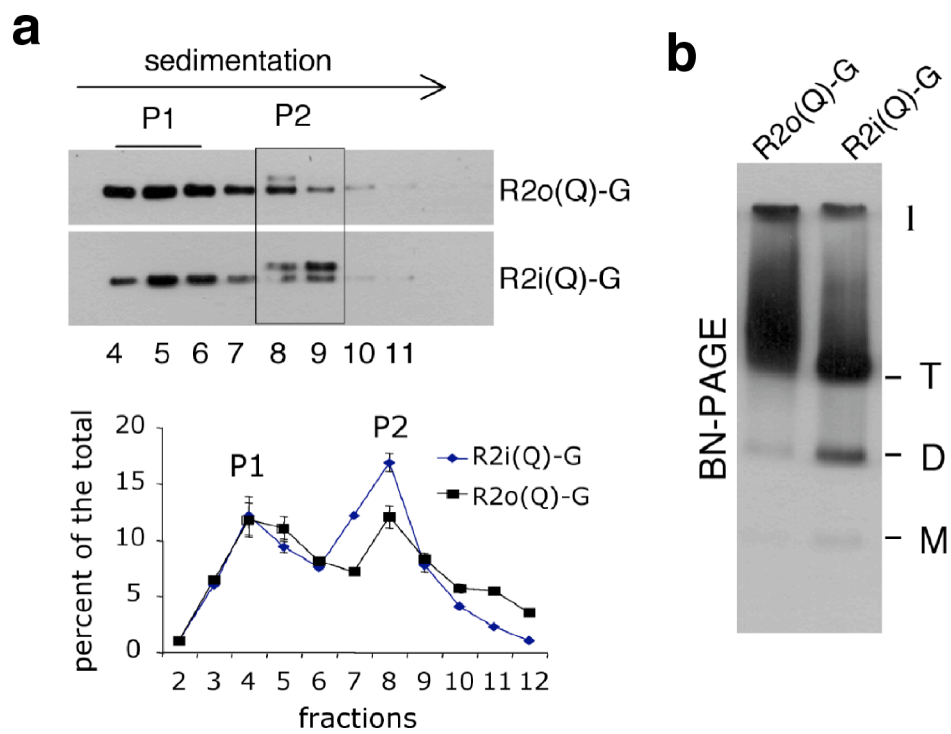

Supplement: emboj2008222s1.pdf [file emboj2008222s1.pdf]

## Suppl. Figure 2

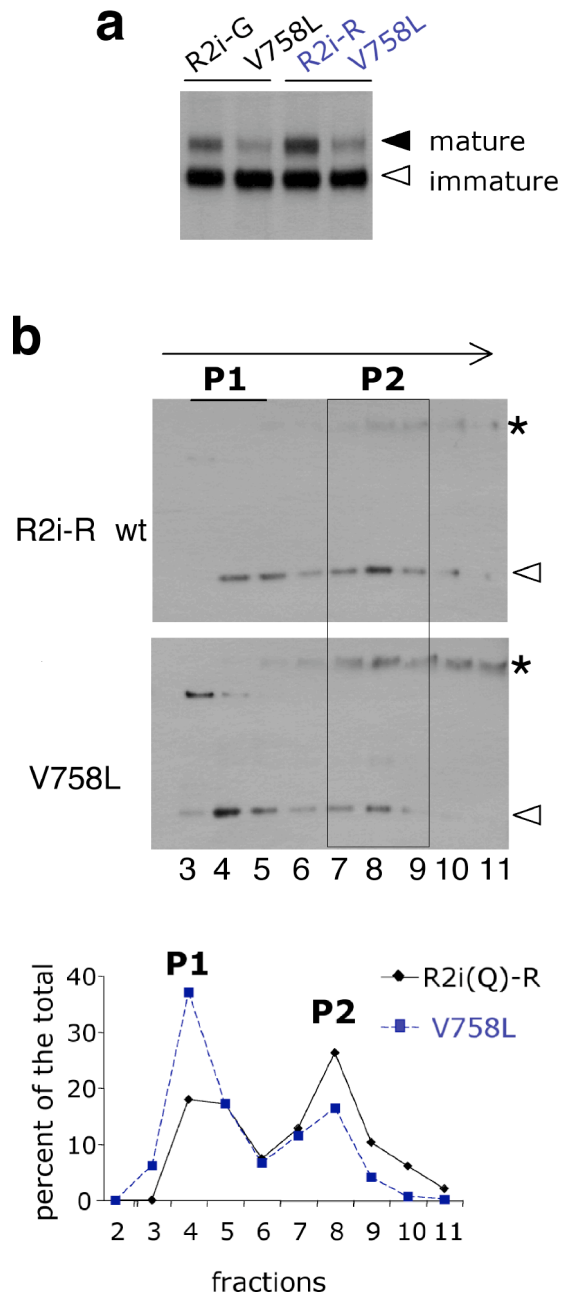

Supplement: emboj2008222s2.pdf [file emboj2008222s2.pdf]

### Suppl. Figure 3

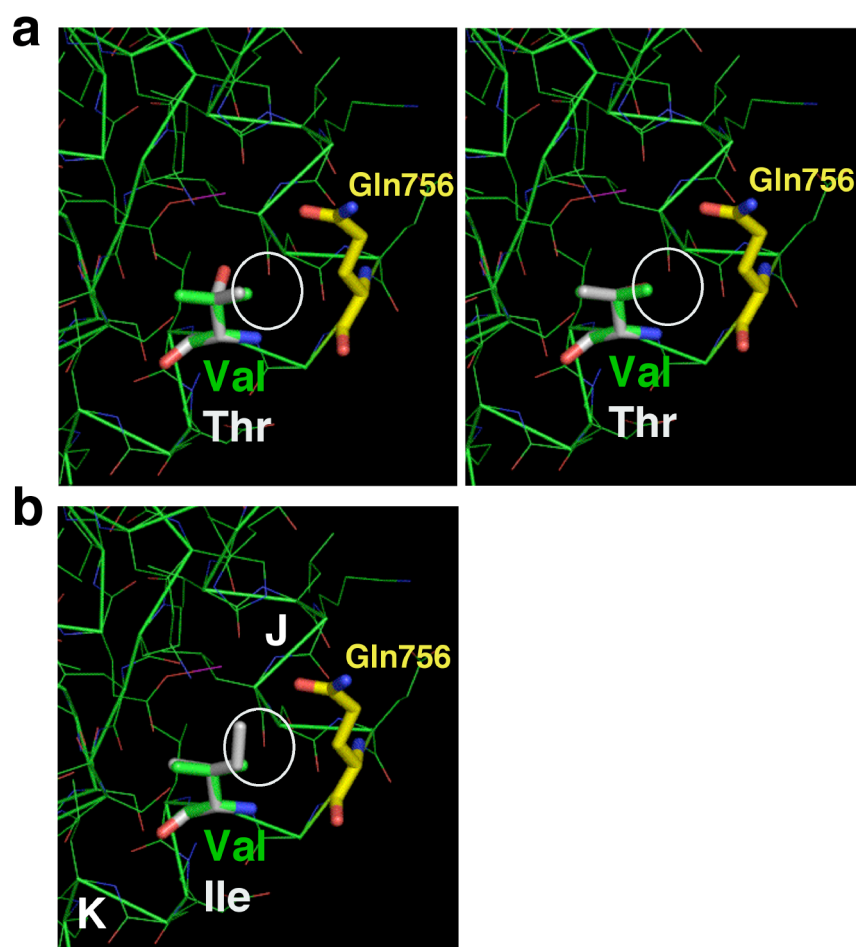

Supplement: emboj2008222s3.pdf [file emboj2008222s3.pdf]

## Suppl. Figure 4

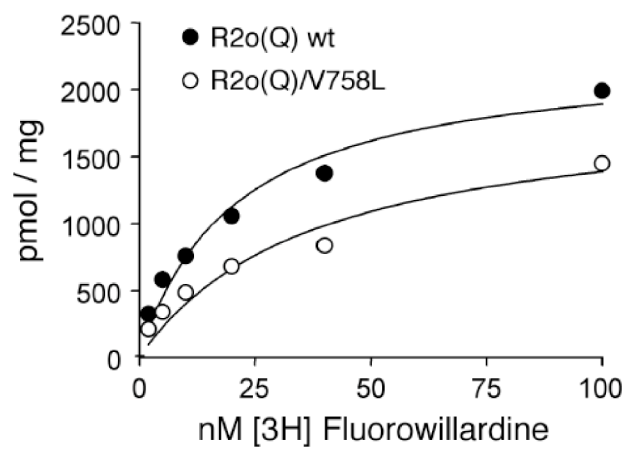

Supplement: emboj2008222s4.pdf [file emboj2008222s4.pdf]

## Suppl. Figure 5

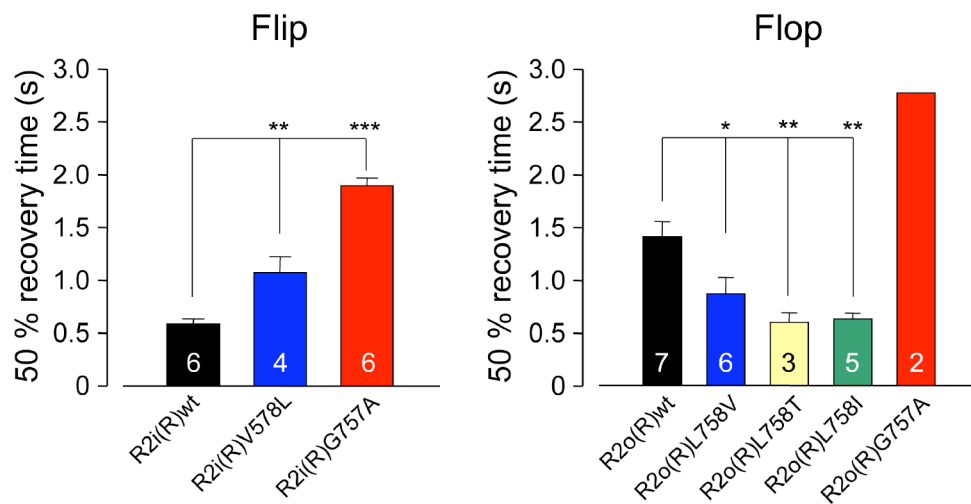

Supplement: emboj2008222s5.pdf [file emboj2008222s5.pdf]

## Suppl. Figure 6

**a**

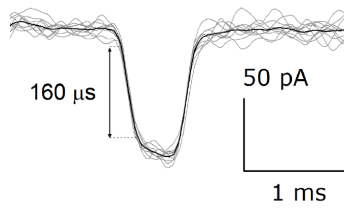

**b**

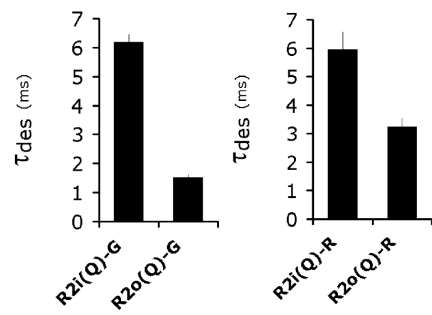

**c**

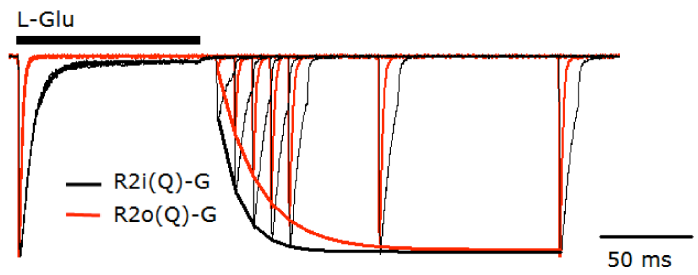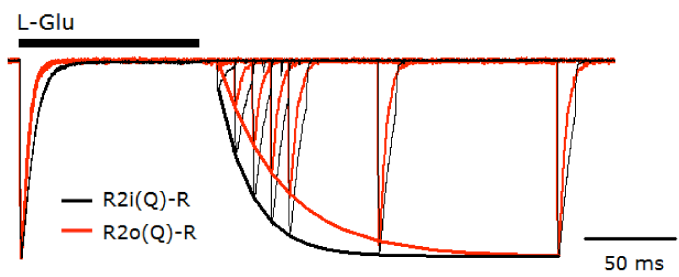

Supplement: emboj2008222s6.pdf [file emboj2008222s6.pdf]

## Suppl. Figure 7

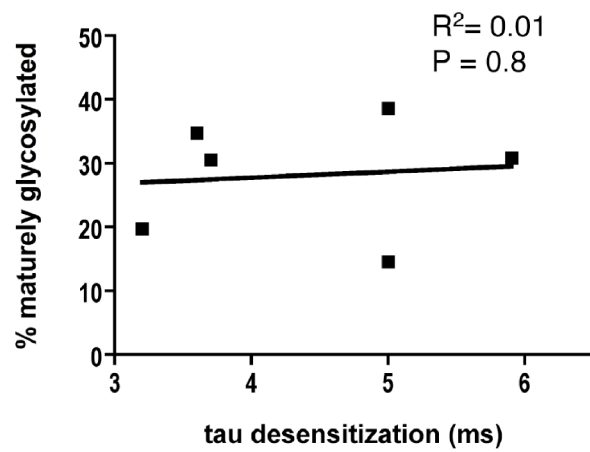

Supplement: emboj2008222s7.pdf [file emboj2008222s7.pdf]

# Suppl. Figure 9

**a**

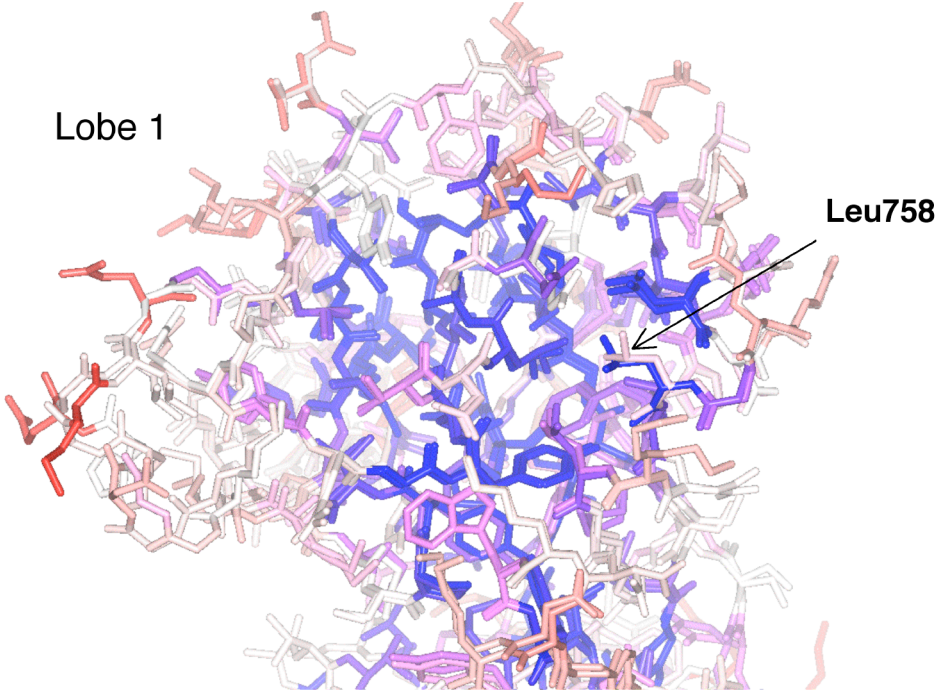

**b**

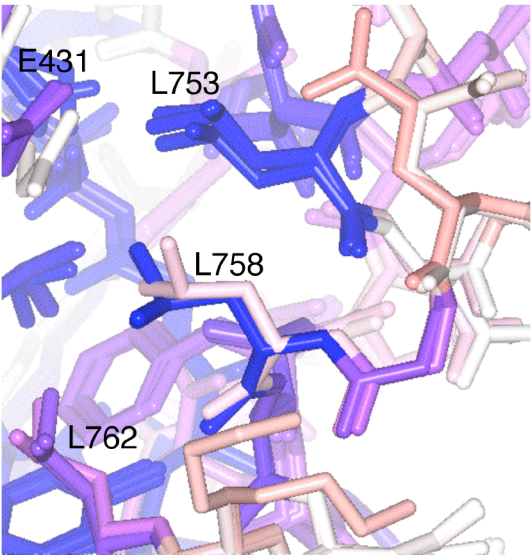

**c**

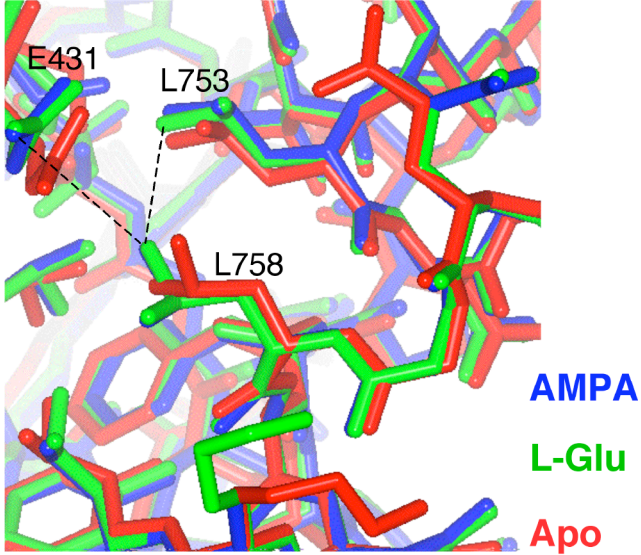

Supplement: emboj2008222s9.pdf [file emboj2008222s9.pdf]
